# Supplementary material for: Optimized decision algorithm for the microbiological diagnosis of osteoarticular infections in adults using synovial fluid samples: a prospective study in two French hospitals including 423 samples of synovial fluid
Source: Copernicus journal article supplement (doi:10.5194/jbji-9-37-2024), 2024-02-06
Supplement: Supplementary file [file jbji-9-37-2024-supplement.pdf]

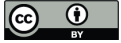

*Supplement of*

**Optimized decision algorithm for the microbiological diagnosis of osteoarticular infections in adults using synovial fluid samples: a prospective study in two French hospitals including 423 samples of synovial fluid**

**Céline Dupieux et al.**

*Correspondence to:* Céline Dupieux ([celine.dupieux@chu-lyon.fr](mailto:celine.dupieux@chu-lyon.fr))

The copyright of individual parts of the supplement might differ from the article licence.

S1: Interpretation of bacteriological results of osteoarticular samples according to the French 2022 national recommendations.

English translation of the *Référentiel en Microbiologie médicale, REMIC*, 7<sup>th</sup> edition, chapter 32, p377:

“The interpretation of microbiological results in the context of bone and joint infections (BJIs) is complex: it must take into account the clinical context (acute *vs.* chronic infection, osteomyelitis *vs.* native joint arthritis *vs.* prosthetic joint infection, prior antibiotic therapy, for example), the species identified, the nature and number of positive samples and, possibly for the latter, the number of positive media and colonies observed.

This interpretation is generally based on the study of several deep samples from the same patient, but there is no definitive consensus on the exact microbiological criteria for diagnosing BJI. The likelihood of infection increases with the number of positive samples for the same bacterium. In the case of samples collected from prosthetic joints, some studies report that the probability is over 95% when at least three samples are positive, around 20% when two samples are positive, only 10% when a single sample is positive, and 3% when cultures are negative.

There are currently several microbiological definitions of the periprosthetic joint infection. In all cases, if two intraoperative samples are positive for the same microorganism (defined by identification and antibiotic susceptibility profile), the infection is microbiologically defined. In the absence of this criterion, some consider the following elements:

- The presence of two deep samples collected at different times (1 intraoperative sample + 1 sample from a joint puncture or blood culture) and positive for the same bacterium;
- The presence of a single deep sample positive for a bacterium that does not belong to the skin flora and for which the question of contamination does not arise (*Staphylococcus aureus*, Enterobacteriaceae, *Pseudomonas aeruginosa*, *Streptococcus pneumoniae*, *Salmonella*, *Listeria*, *Neisseria gonorrhoeae*, *Campylobacter*, *Pasteurella*, for example) [IDSA criterion];
- The presence of a single positive sample in the context of an infection (elevated inflammatory markers, evocative joint cytology, etc.) [MSIS criterion].

In other cases, confirmation of BJI requires analysis of all the clinical and paraclinical data in the file and a dialogue between microbiologists and clinicians.

In the case of septic arthritis, as a single sample is collected (synovial fluid), confirmation of the pathogenic or contaminating nature of any bacteria isolated can only be based on a combination of the cytology, the nature of the bacterial species isolated, the number of positive media and the number of colonies on solid media.”

Table S1: Contaminant bacteria obtained from 423 joint fluids using cultural and molecular approaches.

|                                         | n  | Number of bacteria detected |              |                 |            |           |                   |                   |                           |
|-----------------------------------------|----|-----------------------------|--------------|-----------------|------------|-----------|-------------------|-------------------|---------------------------|
|                                         |    | Culture                     |              |                 | BC bottles |           | PCR               |                   |                           |
|                                         |    | 2-3 days only               | 10 days only | 2-3 and 10 days | 1 bottle   | 2 bottles | 16S rDNA PCR only | Specific PCR only | 16S rDNA and specific PCR |
| Anaerobic species                       | 17 | 0                           | 5            | 0               | 1          | 0         | 0                 | 11                | 0                         |
| incl. <i>Cutibacterium acnes</i>        | 16 | 0                           | 5            | 0               | 0          | 0         | 0                 | 11                | 0                         |
| incl. <i>Cutibacterium granulosum</i>   | 1  | 0                           | 0            | 0               | 1          | 0         | 0                 | NA                | NA                        |
| <i>Streptococcus</i> spp                | 7  | 0                           | 0            | 1               | 0          | 0         | 0                 | 4                 | 2                         |
| <i>Staphylococcus</i> spp               | 24 | 2                           | 1            | 1               | 8          | 1         | 0                 | 11                | 0                         |
| incl. CoNS except <i>S. epidermidis</i> | 12 | 2                           | 1            | 0               | 3          | 0         | 0                 | 6                 | 0                         |
| incl. <i>S. epidermidis</i>             | 12 | 0                           | 0            | 1               | 5          | 1         | 0                 | 5                 | 0                         |
| Gram-negative bacilli                   | 2  | 0                           | 0            | 1               | 0          | 0         | 1                 | NA                | NA                        |
| incl. <i>Haemophilus</i> spp            | 2  | 0                           | 0            | 1               | 0          | 0         | 1                 | 0                 | 0                         |
| Other bacteria                          | 8  | 0                           | 1            | 0               | 2          | 0         | 5                 | NA                | NA                        |
| incl. <i>Bacillus</i> spp               | 1  | 0                           | 1            | 0               | 0          | 0         | 0                 | NA                | NA                        |
| incl. <i>Kocuria</i> spp                | 1  | 0                           | 0            | 0               | 1          | 0         | 0                 | NA                | NA                        |
| incl. <i>Corynebacterium</i> spp        | 3  | 0                           | 0            | 0               | 1          | 0         | 2                 | NA                | NA                        |
| incl. <i>Nocardioides</i> spp           | 1  | 0                           | 0            | 0               | 0          | 0         | 1                 | NA                | NA                        |
| incl. <i>Lactococcus</i> spp            | 1  | 0                           | 0            | 0               | 0          | 0         | 1                 | NA                | NA                        |
| incl. <i>Paracoccus</i> spp             | 1  | 0                           | 0            | 0               | 0          | 0         | 1                 | NA                | NA                        |
| All bacterial species                   | 58 | 2                           | 7            | 3               | 11         | 1         | 6                 | 26                | 2                         |

Table S2: Details of bacteria responsible for infection and detected by only one technique (classical culture, BC bottles, or PCR techniques) in synovial fluid.

|                                          | Number of bacteria detected |                 |           |           |
|------------------------------------------|-----------------------------|-----------------|-----------|-----------|
|                                          | Classical culture only      | BC bottles only | PCR only  | Total     |
| <b>Bacteria</b>                          |                             |                 |           |           |
| <i>Cutibacterium acnes</i>               | 0                           | 1               | 2         | 3         |
| Anaerobic species except <i>C. acnes</i> | 1                           | 1               | 0         | 2         |
| <i>Streptococcus</i> spp                 | 0                           | 1               | 13        | 14        |
| <i>Enterococcus</i> spp                  | 1                           | 2               | 1         | 4         |
| <i>S. aureus</i>                         | 1                           | 4               | 8         | 13        |
| CoNS                                     | 3                           | 19              | 5         | 27        |
| Gram-negative bacilli                    | 0                           | 3               | 6         | 9         |
| Other bacteria                           | 1                           | 0               | 6         | 7         |
| <b>Total</b>                             | <b>7</b>                    | <b>31</b>       | <b>41</b> | <b>79</b> |
| <b>Context</b>                           |                             |                 |           |           |
| Polymicrobial infection, n (%)           | 6 (86)                      | 12 (39)         | 2 (5)     | 20 (25)   |
| Chronic infection, n (%)                 | 6 (86)                      | 13 (42)         | 22 (54)   | 41 (52)   |
| Previous antibiotics (15 days), n (%)    | 4 (57)                      | 13 (42)         | 23 (56)   | 40 (51)   |
| Non-native infection, n (%)              | 4 (57)                      | 20 (65)         | 29 (71)   | 53 (67)   |

Table S3: Sensitivity of each culture medium and PCR evaluated for the detection of bacteria responsible for 242 bone and joint infections in synovial fluid in patients having received antibiotics during the 15 days before SF vs. the patients having not received antibiotics.

| Infections (n)                               | CULTURE           |                             |                  |                              |                   |                     |             |             |              | PCR                       |                      |                          |                          |                     |                           |
|----------------------------------------------|-------------------|-----------------------------|------------------|------------------------------|-------------------|---------------------|-------------|-------------|--------------|---------------------------|----------------------|--------------------------|--------------------------|---------------------|---------------------------|
|                                              | BA aero. (2 days) | CA CO <sub>2</sub> (2 days) | BA ana. (3 days) | CA CO <sub>2</sub> (10 days) | BA ana. (10 days) | SCH broth (10 days) | BC ANA      | BC PED      | 16S rDNA PCR | PCR <i>Staphylococcus</i> | PCR <i>S. aureus</i> | PCR <i>Streptococcus</i> | PCR <i>S. pneumoniae</i> | PCR <i>C. acnes</i> | PCR <i>B. burgdorferi</i> |
| <b>Anaerobic species</b>                     | <b>25</b>         | <b>0.0</b>                  | <b>0.0</b>       | <b>28.0</b>                  | <b>0.0</b>        | <b>40.0</b>         | <b>40.0</b> | <b>48.0</b> | <b>12.0</b>  | <b>36.0</b>               |                      |                          |                          |                     |                           |
| antibiotics                                  | 8                 | 0.0                         | 0.0              | 50.0                         | 0.0               | 62.5                | 75.0        | 50.0        | 12.5         | 37.5                      |                      |                          |                          |                     |                           |
| no antibiotics                               | 17                | 0.0                         | 0.0              | 17.6                         | 0.0               | 29.4                | 23.5        | 47.1        | 11.8         | 35.3                      |                      |                          |                          |                     |                           |
| <b>Anaerobes except <i>C. acnes</i></b>      | <b>13</b>         | <b>0.0</b>                  | <b>0.0</b>       | <b>38.5</b>                  | <b>0.0</b>        | <b>46.2</b>         | <b>53.8</b> | <b>53.8</b> | <b>7.7</b>   | <b>38.5</b>               |                      |                          |                          |                     |                           |
| antibiotics                                  | 8                 | 0.0                         | 0.0              | 50.0                         | 0.0               | 62.5                | 75.0        | 50.0        | 12.5         | 37.5                      |                      |                          |                          |                     |                           |
| no antibiotics                               | 5                 | 0.0                         | 0.0              | 20.0                         | 0.0               | 20.0                | 20.0        | 60.0        | 0.0          | 40.0                      |                      |                          |                          |                     |                           |
| <b><i>Cutibacterium acnes</i></b>            | <b>12</b>         | <b>0.0</b>                  | <b>0.0</b>       | <b>16.7</b>                  | <b>0.0</b>        | <b>33.3</b>         | <b>25.0</b> | <b>41.7</b> | <b>16.7</b>  | <b>33.3</b>               |                      |                          |                          | <b>58.3</b>         |                           |
| antibiotics                                  | 0                 |                             |                  |                              |                   |                     |             |             |              |                           |                      |                          |                          |                     |                           |
| no antibiotics                               | 12                | 0.0                         | 0.0              | 16.7                         | 0.0               | 33.3                | 25.0        | 41.7        | 16.7         | 33.3                      |                      |                          |                          | 58.3                |                           |
| <b><i>Streptococcus-Enterococcus</i> spp</b> | <b>47</b>         | <b>38.3</b>                 | <b>36.2</b>      | <b>38.3</b>                  | <b>36.2</b>       | <b>40.4</b>         | <b>40.4</b> | <b>54.3</b> | <b>54.3</b>  | <b>58.7</b>               |                      |                          |                          |                     |                           |
| antibiotics                                  | 17                | 35.3                        | 29.4             | 29.4                         | 29.4              | 29.4                | 35.3        | 52.9        | 58.8         | 58.8                      |                      |                          |                          |                     |                           |
| no antibiotics                               | 30                | 40.0                        | 40.0             | 43.3                         | 40.0              | 46.7                | 43.3        | 55.2        | 51.7         | 58.6                      |                      |                          |                          |                     |                           |
| <b><i>Enterococcus</i> spp</b>               | <b>12</b>         | <b>41.7</b>                 | <b>41.7</b>      | <b>41.7</b>                  | <b>41.7</b>       | <b>50.0</b>         | <b>58.3</b> | <b>66.7</b> | <b>58.3</b>  | <b>33.3</b>               |                      |                          |                          |                     |                           |
| antibiotics                                  | 5                 | 60.0                        | 60.0             | 60.0                         | 60.0              | 60.0                | 80.0        | 60.0        | 60.0         | 20.0                      |                      |                          |                          |                     |                           |
| no antibiotics                               | 7                 | 28.6                        | 28.6             | 28.6                         | 28.6              | 42.9                | 42.9        | 71.4        | 57.1         | 42.9                      |                      |                          |                          |                     |                           |
| <b><i>Streptococcus</i> spp</b>              | <b>35</b>         | <b>37.1</b>                 | <b>34.3</b>      | <b>37.1</b>                  | <b>34.3</b>       | <b>37.1</b>         | <b>34.3</b> | <b>50.0</b> | <b>52.9</b>  | <b>67.6</b>               |                      | <b>91.2</b>              |                          |                     |                           |
| antibiotics                                  | 12                | 25.0                        | 16.7             | 16.7                         | 16.7              | 16.7                | 16.7        | 50.0        | 58.3         | 75.0                      |                      | 83.3                     |                          |                     |                           |
| no antibiotics                               | 23                | 43.5                        | 43.5             | 47.8                         | 43.5              | 47.8                | 43.5        | 50.0        | 50.0         | 63.6                      |                      | 95.5                     |                          |                     |                           |
| <b><i>S. pneumoniae</i></b>                  | <b>2</b>          | <b>50.0</b>                 | <b>50.0</b>      | <b>50.0</b>                  | <b>50.0</b>       | <b>50.0</b>         | <b>50.0</b> | <b>50.0</b> | <b>50.0</b>  | <b>100.0</b>              |                      | <b>100.0</b>             | <b>100.0</b>             |                     |                           |
| antibiotics                                  | 0                 |                             |                  |                              |                   |                     |             |             |              |                           |                      |                          |                          |                     |                           |
| no antibiotics                               | 2                 | 50.0                        | 50.0             | 50.0                         | 50.0              | 50.0                | 50.0        | 50.0        | 50.0         | 100.0                     |                      | 100.0                    | 100.0                    |                     |                           |
| <b><i>Staphylococcus</i> spp.</b>            | <b>155</b>        | <b>54.2</b>                 | <b>54.2</b>      | <b>51.3</b>                  | <b>53.9</b>       | <b>54.5</b>         | <b>58.7</b> | <b>73.7</b> | <b>79.7</b>  | <b>47.4</b>               | <b>66.2</b>          |                          |                          |                     |                           |
| antibiotics                                  | 44                | 22.7                        | 25.0             | 20.9                         | 25.0              | 20.5                | 31.8        | 54.5        | 59.1         | 34.9                      | 60.5                 |                          |                          |                     |                           |
| no antibiotics                               | 111               | 66.7                        | 65.8             | 63.3                         | 65.5              | 68.2                | 69.4        | 81.5        | 88.1         | 52.3                      | 68.5                 |                          |                          |                     |                           |
| <b><i>S. aureus</i></b>                      | <b>88</b>         | <b>76.1</b>                 | <b>77.3</b>      | <b>75.9</b>                  | <b>77.3</b>       | <b>75.0</b>         | <b>77.3</b> | <b>75.6</b> | <b>85.2</b>  | <b>64.8</b>               | <b>81.8</b>          | <b>85.2</b>              |                          |                     |                           |
| antibiotics                                  | 19                | 26.3                        | 26.3             | 22.2                         | 31.6              | 21.1                | 31.6        | 42.1        | 52.6         | 52.6                      | 78.9                 | 84.2                     |                          |                     |                           |
| no antibiotics                               | 69                | 89.9                        | 91.3             | 89.9                         | 89.9              | 89.9                | 89.9        | 85.1        | 94.2         | 68.1                      | 82.6                 | 85.5                     |                          |                     |                           |
| <b>Non-<i>aureus</i> staphylococci</b>       | <b>67</b>         | <b>25.4</b>                 | <b>23.9</b>      | <b>18.5</b>                  | <b>22.7</b>       | <b>27.3</b>         | <b>34.3</b> | <b>71.2</b> | <b>72.3</b>  | <b>24.2</b>               | <b>45.5</b>          |                          |                          |                     |                           |
| antibiotics                                  | 25                | 20.0                        | 24.0             | 20.0                         | 20.0              | 20.0                | 32.0        | 64.0        | 64.0         | 20.8                      | 45.8                 |                          |                          |                     |                           |
| no antibiotics                               | 42                | 28.6                        | 23.8             | 17.5                         | 24.4              | 31.7                | 35.7        | 75.6        | 77.5         | 26.2                      | 45.2                 |                          |                          |                     |                           |
| <b>Gram-negative bacilli</b>                 | <b>44</b>         | <b>58.1</b>                 | <b>46.5</b>      | <b>31.7</b>                  | <b>45.2</b>       | <b>38.1</b>         | <b>60.5</b> | <b>63.6</b> | <b>81.8</b>  | <b>74.4</b>               |                      |                          |                          |                     |                           |
| antibiotics                                  | 15                | 53.3                        | 40.0             | 21.4                         | 35.7              | 28.6                | 46.7        | 53.3        | 73.3         | 93.3                      |                      |                          |                          |                     |                           |
| no antibiotics                               | 29                | 60.7                        | 50.0             | 37.0                         | 50.0              | 42.9                | 67.9        | 69.0        | 86.2         | 64.3                      |                      |                          |                          |                     |                           |
| <b>Other bacteria</b>                        | <b>13</b>         | <b>7.7</b>                  | <b>30.8</b>      | <b>0.0</b>                   | <b>30.8</b>       | <b>0.0</b>          | <b>0.0</b>  | <b>15.4</b> | <b>30.8</b>  | <b>46.2</b>               |                      |                          |                          |                     | <b>100.0</b>              |
| antibiotics                                  | 6                 | 0.0                         | 33.3             | 0.0                          | 50.0              | 0.0                 | 0.0         | 16.7        | 33.3         | 50.0                      |                      |                          |                          |                     | 100.0                     |
| no antibiotics                               | 7                 | 14.3                        | 28.6             | 0.0                          | 14.3              | 0.0                 | 0.0         | 14.3        | 28.6         | 42.9                      |                      |                          |                          |                     |                           |
| <b>All bacterial species</b>                 | <b>284</b>        | <b>45.2</b>                 | <b>44.2</b>      | <b>41.7</b>                  | <b>43.8</b>       | <b>45.9</b>         | <b>51.8</b> | <b>63.9</b> | <b>67.6</b>  | <b>52.3</b>               |                      |                          |                          |                     |                           |
| antibiotics                                  | 90                | 26.7                        | 26.7             | 23.9                         | 27.0              | 25.8                | 36.7        | 51.1        | 55.6         | 50.6                      |                      |                          |                          |                     |                           |
| no antibiotics                               | 194               | 53.9                        | 52.3             | 50.0                         | 51.6              | 55.2                | 58.9        | 70.0        | 73.3         | 53.1                      |                      |                          |                          |                     |                           |

Table S4: Sensitivity of each culture medium and PCR evaluated for the detection of bacteria responsible for 242 bone and joint infections in synovial fluid in native joint infections vs. non-native joint infections.

|                                              | Infections (n) | CULTURE           |                             |                  |                              |                   |                     |             |             | PCR          |                       |                      |                                     |                          |                     |
|----------------------------------------------|----------------|-------------------|-----------------------------|------------------|------------------------------|-------------------|---------------------|-------------|-------------|--------------|-----------------------|----------------------|-------------------------------------|--------------------------|---------------------|
|                                              |                | BA aero. (2 days) | CA CO <sub>2</sub> (2 days) | BA ana. (3 days) | CA CO <sub>2</sub> (10 days) | BA ana. (10 days) | SCH broth (10 days) | BC ANA      | BC PED      | 16S rDNA PCR | <i>Staphylococcus</i> | PCR <i>S. aureus</i> | PCR <i>Streptococcus pneumoniae</i> | PCR <i>S. pneumoniae</i> | PCR <i>C. acnes</i> |
| <b>Anaerobic species</b>                     | <b>25</b>      | <b>0.0</b>        | <b>0.0</b>                  | <b>28.0</b>      | <b>0.0</b>                   | <b>40.0</b>       | <b>40.0</b>         | <b>48.0</b> | <b>12.0</b> | <b>36.0</b>  |                       |                      |                                     |                          |                     |
| native joint                                 | 3              | 0.0               | 0.0                         | 0.0              | 0.0                          | 0.0               | 0.0                 | 33.3        | 0.0         | 0.0          |                       |                      |                                     |                          |                     |
| non-native joint                             | 22             | 0.0               | 0.0                         | 31.8             | 0.0                          | 45.5              | 45.5                | 50.0        | 13.6        | 40.9         |                       |                      |                                     |                          |                     |
| <b>Anaerobes except <i>C. acnes</i></b>      | <b>13</b>      | <b>0.0</b>        | <b>0.0</b>                  | <b>38.5</b>      | <b>0.0</b>                   | <b>46.2</b>       | <b>53.8</b>         | <b>53.8</b> | <b>7.7</b>  | <b>38.5</b>  |                       |                      |                                     |                          |                     |
| native joint                                 | 0              |                   |                             |                  |                              |                   |                     |             |             |              |                       |                      |                                     |                          |                     |
| non-native joint                             | 13             | 0.0               | 0.0                         | 38.5             | 0.0                          | 46.2              | 53.8                | 53.8        | 7.7         | 38.5         |                       |                      |                                     |                          |                     |
| <b><i>Cutibacterium acnes</i></b>            | <b>12</b>      | <b>0.0</b>        | <b>0.0</b>                  | <b>16.7</b>      | <b>0.0</b>                   | <b>33.3</b>       | <b>25.0</b>         | <b>41.7</b> | <b>16.7</b> | <b>33.3</b>  |                       |                      |                                     |                          | <b>58.3</b>         |
| native joint                                 | 3              | 0.0               | 0.0                         | 0.0              | 0.0                          | 0.0               | 0.0                 | 33.3        | 0.0         | 0.0          |                       |                      |                                     |                          | 0.0                 |
| non-native joint                             | 9              | 0.0               | 0.0                         | 22.2             | 0.0                          | 44.4              | 33.3                | 44.4        | 22.2        | 44.4         |                       |                      |                                     |                          | 77.8                |
| <b><i>Streptococcus-Enterococcus spp</i></b> | <b>47</b>      | <b>38.3</b>       | <b>36.2</b>                 | <b>38.3</b>      | <b>36.2</b>                  | <b>40.4</b>       | <b>40.4</b>         | <b>54.3</b> | <b>54.3</b> | <b>58.7</b>  |                       |                      |                                     |                          |                     |
| native joint                                 | 18             | 35.7              | 35.7                        | 35.7             | 35.7                         | 40.0              | 37.5                | 68.8        | 66.7        | 78.6         |                       |                      |                                     |                          |                     |
| non-native joint                             | 29             | 50.0              | 46.2                        | 50.0             | 46.2                         | 50.0              | 50.0                | 53.8        | 57.7        | 66.7         |                       |                      |                                     |                          |                     |
| <b><i>Enterococcus spp</i></b>               | <b>12</b>      | <b>41.7</b>       | <b>41.7</b>                 | <b>41.7</b>      | <b>41.7</b>                  | <b>50.0</b>       | <b>58.3</b>         | <b>66.7</b> | <b>58.3</b> | <b>33.3</b>  |                       |                      |                                     |                          |                     |
| native joint                                 | 5              | 20.0              | 20.0                        | 20.0             | 20.0                         | 40.0              | 60.0                | 60.0        | 40.0        | 40.0         |                       |                      |                                     |                          |                     |
| non-native joint                             | 7              | 57.1              | 57.1                        | 57.1             | 57.1                         | 57.1              | 57.1                | 71.4        | 71.4        | 28.6         |                       |                      |                                     |                          |                     |
| <b><i>Streptococcus spp</i></b>              | <b>35</b>      | <b>37.1</b>       | <b>34.3</b>                 | <b>37.1</b>      | <b>34.3</b>                  | <b>37.1</b>       | <b>34.3</b>         | <b>50.0</b> | <b>52.9</b> | <b>67.6</b>  |                       |                      | <b>91.2</b>                         |                          |                     |
| native joint                                 | 13             | 30.8              | 30.8                        | 30.8             | 30.8                         | 30.8              | 23.1                | 61.5        | 61.5        | 75.0         |                       |                      | 91.7                                |                          |                     |
| non-native joint                             | 22             | 40.9              | 36.4                        | 40.9             | 36.4                         | 40.9              | 40.9                | 42.9        | 47.6        | 63.6         |                       |                      | 90.9                                |                          |                     |
| <b><i>S. pneumoniae</i></b>                  | <b>2</b>       | <b>50.0</b>       | <b>50.0</b>                 | <b>50.0</b>      | <b>50.0</b>                  | <b>50.0</b>       | <b>50.0</b>         | <b>50.0</b> | <b>50.0</b> | <b>100.0</b> |                       |                      | <b>100.0</b>                        | <b>100.0</b>             |                     |
| native joint                                 | 2              | 50.0              | 50.0                        | 50.0             | 50.0                         | 50.0              | 50.0                | 50.0        | 50.0        | 100.0        |                       |                      | 100.0                               | 100.0                    |                     |
| non-native joint                             | 0              |                   |                             |                  |                              |                   |                     |             |             |              |                       |                      |                                     |                          |                     |
| <b><i>Staphylococcus spp.</i></b>            | <b>155</b>     | <b>54.2</b>       | <b>54.2</b>                 | <b>51.3</b>      | <b>53.9</b>                  | <b>54.5</b>       | <b>58.7</b>         | <b>73.7</b> | <b>79.2</b> | <b>47.4</b>  | <b>66.2</b>           |                      |                                     |                          |                     |
| native joint                                 | 48             | 47.9              | 50.0                        | 47.8             | 46.8                         | 48.9              | 54.2                | 70.2        | 75.0        | 45.8         | 64.6                  |                      |                                     |                          |                     |
| non-native joint                             | 107            | 57.0              | 56.1                        | 52.8             | 57.0                         | 57.0              | 60.7                | 75.2        | 81.1        | 48.1         | 67.0                  |                      |                                     |                          |                     |
| <b><i>S. aureus</i></b>                      | <b>88</b>      | <b>76.1</b>       | <b>77.3</b>                 | <b>75.9</b>      | <b>77.3</b>                  | <b>75.0</b>       | <b>77.3</b>         | <b>75.6</b> | <b>85.2</b> | <b>64.8</b>  | <b>81.8</b>           |                      | <b>85.2</b>                         |                          |                     |
| native joint                                 | 27             | 74.1              | 77.8                        | 74.1             | 74.1                         | 74.1              | 74.1                | 70.4        | 85.2        | 63.0         | 74.1                  |                      | 77.8                                |                          |                     |
| non-native joint                             | 61             | 77.0              | 77.0                        | 76.7             | 78.7                         | 75.4              | 78.7                | 78.0        | 85.2        | 65.6         | 85.2                  |                      | 88.5                                |                          |                     |
| <b>Non-aureus staphylococci</b>              | <b>67</b>      | <b>25.4</b>       | <b>23.9</b>                 | <b>18.5</b>      | <b>22.7</b>                  | <b>27.3</b>       | <b>34.3</b>         | <b>71.2</b> | <b>71.2</b> | <b>24.2</b>  | <b>45.5</b>           |                      |                                     |                          |                     |
| native joint                                 | 21             | 14.3              | 14.3                        | 10.5             | 10.0                         | 15.0              | 28.6                | 70.0        | 61.9        | 23.8         | 52.4                  |                      |                                     |                          |                     |
| non-native joint                             | 46             | 30.4              | 28.3                        | 21.7             | 28.3                         | 32.6              | 37.0                | 71.7        | 75.6        | 24.4         | 42.2                  |                      |                                     |                          |                     |
| <b>Gram-negative bacilli</b>                 | <b>44</b>      | <b>58.1</b>       | <b>46.5</b>                 | <b>31.7</b>      | <b>45.2</b>                  | <b>38.1</b>       | <b>60.5</b>         | <b>63.6</b> | <b>81.8</b> | <b>74.4</b>  |                       |                      |                                     |                          |                     |
| native joint                                 | 13             | 69.2              | 53.8                        | 18.2             | 50.0                         | 33.3              | 61.5                | 69.2        | 92.3        | 61.5         |                       |                      |                                     |                          |                     |
| non-native joint                             | 31             | 53.3              | 43.3                        | 36.7             | 43.3                         | 40.0              | 60.0                | 61.3        | 77.4        | 80.0         |                       |                      |                                     |                          |                     |
| <b>Other bacteria</b>                        | <b>13</b>      | <b>7.7</b>        | <b>30.8</b>                 | <b>0.0</b>       | <b>30.8</b>                  | <b>0.0</b>        | <b>0.0</b>          | <b>15.4</b> | <b>30.8</b> | <b>46.2</b>  |                       |                      |                                     |                          |                     |
| native joint                                 | 6              | 0.0               | 33.3                        | 0.0              | 33.3                         | 0.0               | 0.0                 | 16.7        | 33.3        | 16.7         |                       |                      |                                     |                          |                     |
| non-native joint                             | 7              | 14.3              | 28.6                        | 0.0              | 28.6                         | 0.0               | 0.0                 | 14.3        | 28.6        | 71.4         |                       |                      |                                     |                          |                     |
| <b>All bacterial species</b>                 | <b>284</b>     | <b>45.2</b>       | <b>44.2</b>                 | <b>41.7</b>      | <b>43.8</b>                  | <b>45.9</b>       | <b>51.8</b>         | <b>63.9</b> | <b>67.4</b> | <b>52.3</b>  |                       |                      |                                     |                          |                     |
| native joint                                 | 88             | 44.0              | 45.2                        | 36.3             | 42.7                         | 39.8              | 47.1                | 64.7        | 70.6        | 50.0         |                       |                      |                                     |                          |                     |
| non-native joint                             | 196            | 47.4              | 45.3                        | 45.5             | 45.8                         | 50.0              | 55.2                | 64.9        | 67.7        | 55.6         |                       |                      |                                     |                          |                     |

Table S5: Sensitivity of each culture medium and PCR evaluated for the detection of bacteria responsible for 242 bone and joint infections in synovial fluid in acute vs. chronic infections.

| Infections (n)                               | CULTURE           |                             |                  |                              |                   |                     |             |             |              | PCR                   |                      |                                     |                          |                     |
|----------------------------------------------|-------------------|-----------------------------|------------------|------------------------------|-------------------|---------------------|-------------|-------------|--------------|-----------------------|----------------------|-------------------------------------|--------------------------|---------------------|
|                                              | BA aero. (2 days) | CA CO <sub>2</sub> (2 days) | BA ana. (3 days) | CA CO <sub>2</sub> (10 days) | BA ana. (10 days) | SCH broth (10 days) | BC ANA      | BC PED      | 16S rDNA PCR | <i>Staphylococcus</i> | PCR <i>S. aureus</i> | PCR <i>Streptococcus pneumoniae</i> | PCR <i>S. pneumoniae</i> | PCR <i>C. acnes</i> |
| <b>Anaerobic species</b>                     | <b>25</b>         | <b>0.0</b>                  | <b>0.0</b>       | <b>28.0</b>                  | <b>0.0</b>        | <b>40.0</b>         | <b>40.0</b> | <b>48.0</b> | <b>12.0</b>  | <b>36.0</b>           |                      |                                     |                          |                     |
| acute infection                              | 3 *               | 0.0                         | 0.0              | 33.3                         | 0.0               | 33.3                | 33.3        | 66.7        | 0.0          | 33.3                  |                      |                                     |                          |                     |
| chronic infection                            | 21 *              | 0.0                         | 0.0              | 23.8                         | 0.0               | 38.1                | 42.9        | 42.9        | 14.3         | 33.3                  |                      |                                     |                          |                     |
| <b>Anaerobes except <i>C. acnes</i></b>      | <b>13</b>         | <b>0.0</b>                  | <b>0.0</b>       | <b>38.5</b>                  | <b>0.0</b>        | <b>46.2</b>         | <b>53.8</b> | <b>53.8</b> | <b>7.7</b>   | <b>38.5</b>           |                      |                                     |                          |                     |
| acute infection                              | 0 *               |                             |                  |                              |                   |                     |             |             |              |                       |                      |                                     |                          |                     |
| chronic infection                            | 12 *              | 0.0                         | 0.0              | 33.3                         | 0.0               | 41.7                | 58.3        | 50.0        | 8.3          | 33.3                  |                      |                                     |                          |                     |
| <b><i>Cutibacterium acnes</i></b>            | <b>12</b>         | <b>0.0</b>                  | <b>0.0</b>       | <b>16.7</b>                  | <b>0.0</b>        | <b>33.3</b>         | <b>25.0</b> | <b>41.7</b> | <b>16.7</b>  | <b>33.3</b>           |                      |                                     |                          | <b>58.3</b>         |
| acute infection                              | 3                 | 0.0                         | 0.0              | 33.3                         | 0.0               | 33.3                | 33.3        | 66.7        | 0.0          | 33.3                  |                      |                                     |                          | 66.7                |
| chronic infection                            | 9                 | 0.0                         | 0.0              | 11.1                         | 0.0               | 33.3                | 22.2        | 33.3        | 22.2         | 33.3                  |                      |                                     |                          | 55.6                |
| <b><i>Streptococcus-Enterococcus spp</i></b> | <b>47</b>         | <b>38.3</b>                 | <b>36.2</b>      | <b>38.3</b>                  | <b>36.2</b>       | <b>40.4</b>         | <b>40.4</b> | <b>54.3</b> | <b>54.3</b>  | <b>58.7</b>           |                      |                                     |                          |                     |
| acute infection                              | 27                | 25.9                        | 25.9             | 29.6                         | 25.9              | 33.3                | 29.6        | 57.7        | 53.8         | 65.4                  |                      |                                     |                          |                     |
| chronic infection                            | 20                | 55.0                        | 50.0             | 50.0                         | 50.0              | 50.0                | 55.0        | 50.0        | 55.0         | 50.0                  |                      |                                     |                          |                     |
| <b><i>Enterococcus spp</i></b>               | <b>12</b>         | <b>41.7</b>                 | <b>41.7</b>      | <b>41.7</b>                  | <b>41.7</b>       | <b>50.0</b>         | <b>58.3</b> | <b>66.7</b> | <b>58.3</b>  | <b>33.3</b>           |                      |                                     |                          |                     |
| acute infection                              | 5                 | 20.0                        | 20.0             | 20.0                         | 20.0              | 40.0                | 40.0        | 80.0        | 60.0         | 40.0                  |                      |                                     |                          |                     |
| chronic infection                            | 7                 | 57.1                        | 57.1             | 57.1                         | 57.1              | 57.1                | 71.4        | 57.1        | 57.1         | 28.6                  |                      |                                     |                          |                     |
| <b><i>Streptococcus spp</i></b>              | <b>35</b>         | <b>37.1</b>                 | <b>34.3</b>      | <b>37.1</b>                  | <b>34.3</b>       | <b>37.1</b>         | <b>34.3</b> | <b>50.0</b> | <b>52.9</b>  | <b>67.6</b>           |                      | <b>91.2</b>                         |                          |                     |
| acute infection                              | 22                | 27.3                        | 27.3             | 31.8                         | 27.3              | 31.8                | 27.3        | 52.4        | 52.4         | 71.4                  |                      | 95.2                                |                          |                     |
| chronic infection                            | 13                | 53.8                        | 46.2             | 46.2                         | 46.2              | 46.2                | 46.2        | 46.2        | 53.8         | 61.5                  |                      | 84.6                                |                          |                     |
| <b><i>S. pneumoniae</i></b>                  | <b>2</b>          | <b>50.0</b>                 | <b>50.0</b>      | <b>50.0</b>                  | <b>50.0</b>       | <b>50.0</b>         | <b>50.0</b> | <b>50.0</b> | <b>50.0</b>  | <b>100.0</b>          |                      | <b>100.0</b>                        | <b>100.0</b>             |                     |
| acute infection                              | 2                 | 50.0                        | 50.0             | 50.0                         | 50.0              | 50.0                | 50.0        | 50.0        | 50.0         | 100.0                 |                      | 100.0                               | 100.0                    |                     |
| chronic infection                            | 0                 |                             |                  |                              |                   |                     |             |             |              |                       |                      |                                     |                          |                     |
| <b><i>Staphylococcus spp.</i></b>            | <b>155</b>        | <b>54.2</b>                 | <b>54.2</b>      | <b>51.3</b>                  | <b>53.9</b>       | <b>54.5</b>         | <b>58.7</b> | <b>73.7</b> | <b>79.7</b>  | <b>47.4</b>           | <b>66.2</b>          |                                     |                          |                     |
| acute infection                              | 73                | 56.2                        | 56.2             | 53.5                         | 53.4              | 54.8                | 63.0        | 75.3        | 80.8         | 50.0                  | 63.9                 |                                     |                          |                     |
| chronic infection                            | 82                | 52.4                        | 52.4             | 49.4                         | 54.3              | 54.3                | 54.9        | 72.2        | 78.8         | 45.1                  | 68.3                 |                                     |                          |                     |
| <b><i>S. aureus</i></b>                      | <b>88</b>         | <b>76.1</b>                 | <b>77.3</b>      | <b>75.9</b>                  | <b>77.3</b>       | <b>75.0</b>         | <b>77.3</b> | <b>75.6</b> | <b>85.2</b>  | <b>64.8</b>           | <b>81.8</b>          | <b>85.2</b>                         |                          |                     |
| acute infection                              | 43                | 81.4                        | 83.7             | 81.0                         | 81.4              | 79.1                | 81.4        | 79.1        | 88.4         | 74.4                  | 81.4                 | 83.7                                |                          |                     |
| chronic infection                            | 45                | 71.1                        | 71.1             | 71.1                         | 73.3              | 71.1                | 73.3        | 72.1        | 82.2         | 55.6                  | 82.2                 | 86.7                                |                          |                     |
| <b>Non-aureus staphylococci</b>              | <b>67</b>         | <b>25.4</b>                 | <b>23.9</b>      | <b>18.5</b>                  | <b>22.7</b>       | <b>27.3</b>         | <b>34.3</b> | <b>71.2</b> | <b>72.3</b>  | <b>24.2</b>           | <b>45.5</b>          |                                     |                          |                     |
| acute infection                              | 30                | 20.0                        | 16.7             | 13.8                         | 13.3              | 20.0                | 36.7        | 70.0        | 70.0         | 13.8                  | 37.9                 |                                     |                          |                     |
| chronic infection                            | 37                | 29.7                        | 29.7             | 22.2                         | 30.6              | 33.3                | 32.4        | 72.2        | 74.3         | 32.4                  | 51.4                 |                                     |                          |                     |
| <b>Gram-negative bacilli</b>                 | <b>44</b>         | <b>58.1</b>                 | <b>46.5</b>      | <b>31.7</b>                  | <b>45.2</b>       | <b>38.1</b>         | <b>60.5</b> | <b>63.6</b> | <b>81.8</b>  | <b>74.4</b>           |                      |                                     |                          |                     |
| acute infection                              | 20                | 63.2                        | 52.6             | 33.3                         | 52.6              | 42.1                | 57.9        | 65.0        | 80.0         | 73.7                  |                      |                                     |                          |                     |
| chronic infection                            | 24                | 54.2                        | 41.7             | 30.4                         | 39.1              | 34.8                | 62.5        | 62.5        | 83.3         | 75.0                  |                      |                                     |                          |                     |
| <b>Other bacteria</b>                        | <b>13</b>         | <b>7.7</b>                  | <b>30.8</b>      | <b>0.0</b>                   | <b>30.8</b>       | <b>0.0</b>          | <b>0.0</b>  | <b>15.4</b> | <b>30.8</b>  | <b>46.2</b>           |                      |                                     |                          |                     |
| acute infection                              | 6                 | 0.0                         | 33.3             | 0.0                          | 33.3              | 0.0                 | 0.0         | 16.7        | 33.3         | 33.3                  |                      |                                     |                          |                     |
| chronic infection                            | 7                 | 14.3                        | 28.6             | 0.0                          | 28.6              | 0.0                 | 0.0         | 14.3        | 28.6         | 57.1                  |                      |                                     |                          |                     |
| <b>All bacterial species</b>                 | <b>284</b>        | <b>45.2</b>                 | <b>44.2</b>      | <b>41.7</b>                  | <b>43.8</b>       | <b>45.9</b>         | <b>51.8</b> | <b>63.9</b> | <b>67.6</b>  | <b>52.3</b>           |                      |                                     |                          |                     |
| acute infection                              | 129 *             | 46.9                        | 46.9             | 42.4                         | 45.3              | 45.3                | 52.0        | 67.2        | 71.1         | 55.6                  |                      |                                     |                          |                     |
| chronic infection                            | 154 *             | 44.2                        | 42.2             | 40.8                         | 42.8              | 46.1                | 51.9        | 60.9        | 65.1         | 49.4                  |                      |                                     |                          |                     |

\* In 1 case, no information was available on whether the infection was acute or chronic.
